# Supplementary material for: A simple and direct atomic absorption spectrometry method for the direct determination of Hg in dried blood spots and dried urine spots prepared using various microsampling devices
Source: Royal Society of Chemistry journal article supplement (doi:10.1039/c9ja00348g), 2019-11-27

## Supplementary Material

**Figure S1.** Relation between the certified Hg concentration of CRMs (x-axis) and the experimental Hg concentration (y-axis). The experimental error bars correspond to the 95% confidence interval (n = 5).

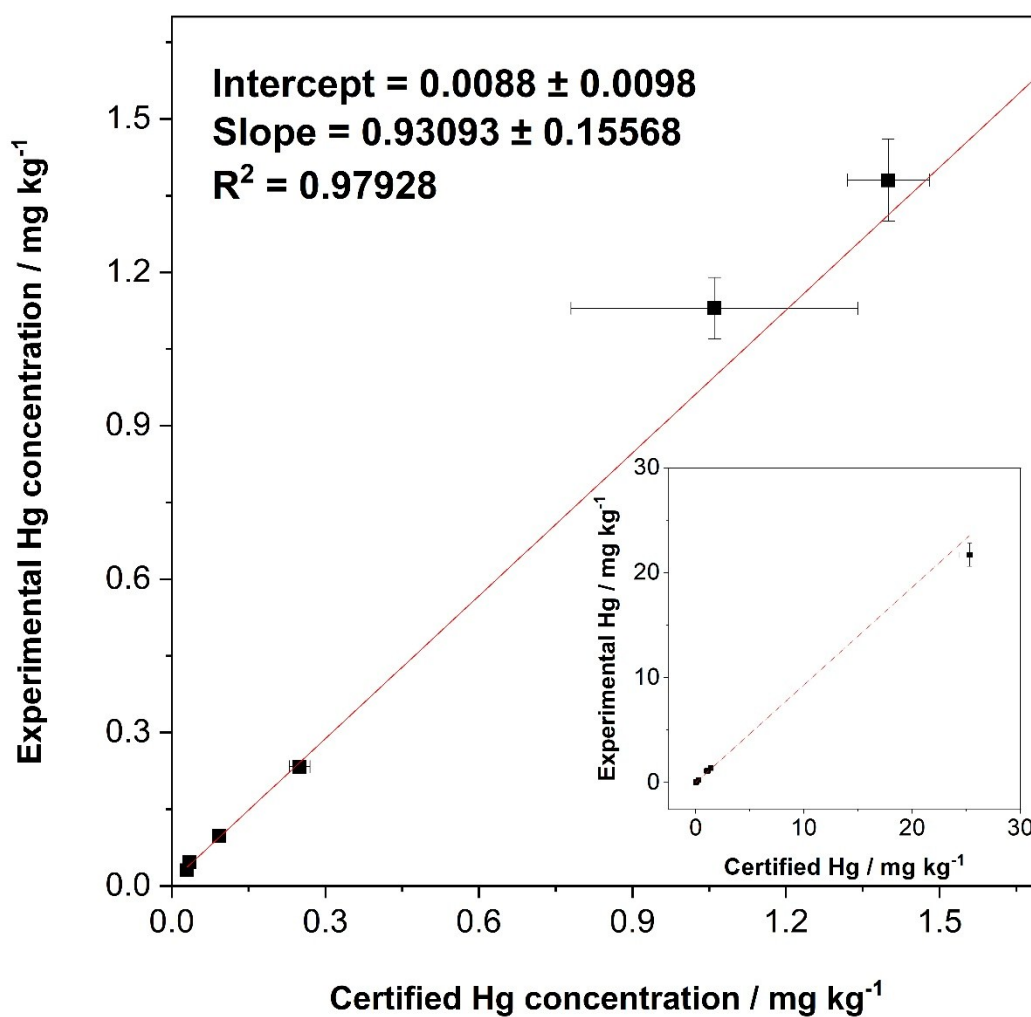

Supplement: c9ja00348g1.pdf [file c9ja00348g1.pdf]
